# Supplementary material for: Squaraine-based AIEgens for reversible mechanochromism, sensitive and selective hypochlorite detection and photostable far-red fluorescence cell imaging
Source: Royal Society of Chemistry journal article supplement (doi:10.1039/d0qm00357c), 2020-01-01
Supplement: d0qm00357c1.pdf [file d0qm00357c1.pdf]

## **Squaraine-based AIEgens for Reversible Mechanochromism, Sensitive and Selective Hypochlorite Detection and Photostable Far-red Fluorescence Cell Imaging**

Weiguo Qiao, Peigen Yao, Yu Chen, Qi Xiao, Lianbin Zhang and Zhong'an Li\*

Key Laboratory for Material Chemistry of Energy Conversion and Storage, Ministry of Education, School of Chemistry and Chemical Engineering, Huazhong University of Science and Technology, Wuhan, 430074, P. R. China  
Email: lizha@hust.edu.cn

### **Materials and method**

**Materials:** All reagents and solvents were chemical pure (CP) grade or analytical reagent (AR) grade and were used as received unless indicated. Compounds **1**, **3**, **7** and **10** were synthesized following the methods reported by previous literature<sup>1-4</sup>.

**Measurements:** <sup>1</sup>H NMR and <sup>13</sup>C NMR spectra were measured on a Bruker AV 400 or 600 spectrometer at 298 K in CDCl<sub>3</sub>. UV-vis-NIR absorption spectra were recorded on a PerkinElmer LAMBDA 750 spectrophotometer. Fluorescent emission spectra were collected on an OmniFluo-960 fluorophotometer at 298 K. Dynamic light scattering (DLS) measurements were conducted using a Zetasizer Nano equipment. High-resolution mass spectrum were measured on an Ion Spec 4.7 Tesla FTMS instrument. The single crystal data of **TPE-SQ1** was collected on Rigaku Saturn diffractometer with CCD area detector. All calculations were performed using the SHELXL97 and crystal structure crystallographic software packages. Absolute fluorescence quantum yield were measured by FLS1000 Photoluminescence Spectrometer. Thermogravimetric analysis (TGA) and differential scanning calorimetry (DSC) were performed using a Netzsch STA449F3 instrument under a nitrogen atmosphere with a heating rate of 10 °C min<sup>-1</sup>. Bioimages in 4T1 cells were obtained using an Olympus Fluoview FV 1200 laser scanning confocal microscopy.

**Compound 4:** A mixture of compound **1** (0.41 g, 1.00 mmol), Pd<sub>2</sub>(dba)<sub>3</sub> (0.20 g, 0.22 mmol), and sodium tert-butoxide (0.13 g, 1.40 mmol) was added into a Schlenk flask, which was then

evacuated and deoxygenated with nitrogen gas three times. Afterwards, 80 mL of dry toluene, aniline (**2**, 0.11 g, 1.20 mmol) and tri-tert-butylphosphine (0.13 g, 0.66 mmol) were added, and then the resulting mixture was heated to 115 °C for 17 h. After cooling down to room temperature, the mixture was extracted with dichloromethane (DCM) three times. The organic layer was collected, washed with water and dried with anhydrous Na<sub>2</sub>SO<sub>4</sub>. After concentration using a rotary evaporator, the crude product was purified by column chromatography on the silica gel (DCM/petroleum ether = 1/3, V/V) to obtain a yellow-green solid compound (0.22 g, 50.9%). <sup>1</sup>H NMR (600 MHz, CDCl<sub>3</sub>, ppm): δ 7.28 – 7.24 (m, 2H), 7.19 – 7.07 (m, 13H, ArH), 7.07 – 7.01 (m, 4H, ArH), 6.92 (d, *J* = 8.5 Hz, 3H, ArH), 6.82 (d, *J* = 8.4 Hz, 2H, ArH), 5.67 (s, 1H, -NH).

**TPE-SQ1**: A mixture of compound **4** (0.10 g, 0.24 mmol) and squaric acid (0.01 g, 0.10 mmol) was added into a Schlenk flask, which was then evacuated and deoxygenated with nitrogen gas three times. Afterwards, dry n-butanol (2 mL) and dry toluene (2 mL) were injected into the Schlenk flask, respectively, and the resulting mixture was then heated to 110 °C under reflux for 24 h. After cooling down to room temperature, the product was precipitated from the reaction solution, filtered under reduced pressure and washed with methanol. Finally, the crude product was purified by column chromatography on the silica gel (DCM) to obtain a yellow solid compound (0.08 g, 85.0%). <sup>1</sup>H NMR (400 MHz, CDCl<sub>3</sub>, ppm): δ 7.38 (m, 6H, ArH), 7.20 – 6.98 (m, 38H, ArH), 6.92 (d, *J* = 8.2 Hz, 4H, ArH). Due to the poor solubility of **TPE-SQ1**, its <sup>13</sup>C NMR was not tested. HR-ESI-MS: *m/z* calcd. for C<sub>68</sub>H<sub>48</sub>N<sub>2</sub>O<sub>2</sub>: 925.37886 [M+H<sup>+</sup>], found 925.37739 [M+H<sup>+</sup>]. Element analysis calcd. for C<sub>68</sub>H<sub>48</sub>N<sub>2</sub>O<sub>2</sub>: C (88.28%), H (5.23%), N (3.03%); found: C (87.53%), H (5.53%), N (2.97%).

**Compound 5**: A mixture of compound **1** (0.60 g, 1.46 mmol), compound **3** (0.39 g, 1.75 mmol), Pd<sub>2</sub>(dba)<sub>3</sub> (0.30 g, 0.32 mmol) and sodium tert-butoxide (0.20 g, 2.04 mmol) was added into a Schlenk flask, which was then evacuated and deoxygenated with nitrogen gas three times. Afterwards, dry toluene (10 mL) and tri-tert-butylphosphine (0.20 g, 0.97 mmol) were injected into the Schlenk flask, respectively, and the resulting mixture was heated to 115

°C for 24 h. After cooling down to room temperature, the solution was extracted with DCM three times. The organic layer was collected, washed with water and dried with anhydrous  $\text{Na}_2\text{SO}_4$ . After concentration using a rotary evaporator, the crude product was purified by column chromatography on the silica gel (DCM/petroleum ether = 1/4, V/V) to obtain a red solid compound (1.43 g, 74.5%).  $^1\text{H}$  NMR (400 MHz,  $\text{CDCl}_3$ , ppm):  $\delta$  7.18 – 7.04 (m, 13H, ArH), 7.13 – 6.97 (m, 4H, ArH), 6.86 – 6.79 (m, 4H, ArH), 6.66 – 6.60 (m, 2H, ArH), 5.44 (s, 1H, -NH), 3.84 – 3.76 (m, 2H,  $-\text{OCH}_2-$ ), 1.75 – 1.65 (m, 1H, -CH), 1.52 – 1.26 (m, 8H,  $-\text{CH}_2-$ ), 0.96 – 0.85 (m, 6H,  $-\text{CH}_3$ ).

**TPE-SQ2:** A mixture of compound **5** (0.50 g, 0.91 mmol) and squaric acid (0.04 g, 0.36 mmol) was added into a Schlenk flask, which was then evacuated and deoxygenated with nitrogen gas three times. Afterwards, dry n-butanol (7 mL) and dry toluene (7 mL) were injected into the Schlenk flask, and the mixture was heated to 110 °C for 24 h under reflux. After cooling down to room temperature, the reaction solvent was removed by using a rotary evaporator. The crude product was purified by column chromatography on the silica gel (DCM/petroleum ether = 2/1, V/V), and then further recrystallized from DCM and petroleum ether to obtain a yellow solid compound (0.13 g, 30.0%).  $^1\text{H}$  NMR (600 MHz,  $\text{CDCl}_3$ , ppm):  $\delta$  7.18 – 6.80 (m, 46H, ArH), 3.84 (d,  $J$  = 12.0 Hz, 4H,  $-\text{OCH}_2-$ ), 1.72 (s, 2H, -CH), 1.53 – 1.29 (m, 16H,  $-\text{CH}_2-$ ), 0.94 (s, 12H,  $-\text{CH}_3$ ).  $^{13}\text{C}$  NMR (100 MHz,  $\text{CDCl}_3$ , ppm):  $\delta$  177.4, 158.5, 143.5, 143.1, 141.6, 140.0, 139.0, 133.1, 131.7, 131.4, 131.3, 127.7, 127.6, 126.8, 126.6, 126.5, 123.7, 114.5, 86.1, 70.5, 49.2, 43.4, 39.4, 30.5, 29.1, 29.0, 27.2, 23.9, 23.1, 20.3, 14.1, 13.8, 11.2. HR-ESI-MS:  $m/z$  calcd. for  $\text{C}_{84}\text{H}_{80}\text{N}_2\text{O}_4$ : 1181.61909  $[\text{M}+\text{H}^+]$ , found 1181.61862  $[\text{M}+\text{H}^+]$ . Element analysis calcd. for  $\text{C}_{84}\text{H}_{80}\text{N}_2\text{O}_4$ : C (85.39%), H (6.82%), N (2.37%); found: C (85.18%), H (7.23%), N (2.29%).

**Compound 8:** Compound **5** (1.06 g, 1.81 mmol) and compound **7** (0.31 g, 1.81 mmol) were added to a 50 mL round-bottomed flask, and then ethanol (10 mL) and concentrated hydrochloric acid (1 mL) were added. The mixture was heated under reflux for 3 h. After cooling down to room temperature, the reaction solvent was removed by using a rotary

evaporator. The crude product was purified by column chromatography to obtain a green solid compound (0.77 g, 63.0%). <sup>1</sup>H NMR (400 MHz, CDCl<sub>3</sub>, ppm): δ 7.15 – 7.08 (m, 9H, ArH), 7.07 – 6.98 (m, 10H, ArH), 6.92 – 6.86 (m, *J* = 6.8 Hz, 2H, ArH), 6.85 – 6.79 (m, *J* = 6.8 Hz, 2H, ArH), 4.69 (q, *J* = 7.2 Hz, 2H, -OCH<sub>2</sub>-), 3.84 (d, *J* = 5.6 Hz, 2H, -OCH<sub>2</sub>-), 1.81 – 1.65 (m, 1H, -CH-), 1.55 – 1.37 (m, 3H, -CH<sub>3</sub>), 1.37 – 1.23 (m, 8H, -CH<sub>2</sub>-), 1.00 – 0.88 (m, 6H, -CH<sub>3</sub>).

Compound **9**: compound **8** (0.5 g, 0.74 mmol) was added to a 50 mL round-bottomed flask, and then acetone (5 mL) and 6M HCl (5 mL) were sequentially added. The reaction mixture was heated under reflux for 4 h. After cooling down to room temperature, the reaction was extracted with DCM three times. The organic layer was collected, washed with water and dried with anhydrous Na<sub>2</sub>SO<sub>4</sub>. After concentration using a rotary evaporator, the crude product was purified by column chromatography (DCM/methanol = 50/1, V/V) to obtain a gray-green solid compound (0.21 g, 43.5%). <sup>1</sup>H NMR (400 MHz, CDCl<sub>3</sub>, ppm): δ 7.23 – 6.25 (br, m, 23H, ArH), 3.79 (br, s, 2H, -OCH<sub>2</sub>-), 1.67 (s, 1H, -CH), 1.56 – 1.21 (br, m, 8H, -CH<sub>2</sub>-), 0.97 – 0.77 (br, s, 6H, -CH<sub>3</sub>).

**TPE-SQ3**: A mixture of compound **9** (1.0 g, 1.54 mmol) and compound **10** (0.53 g, 1.54 mmol) were added to a Dean-Stark apparatus, which was evacuated and deoxygenated with nitrogen gas three times. Afterwards, n-butanol (7 mL) and toluene (7 mL) were injected into the Dean-Stark apparatus, respectively, and the resulting mixture was heated to 140 °C for 24 h. After cooling down to room temperature, the reaction solvent was removed by using a rotary evaporator. The crude product was purified by column chromatography (DCM/methanol = 100/1, V/V) to obtain a purple-black solid compound (0.56 g, 42.8%). <sup>1</sup>H NMR (600 MHz, CDCl<sub>3</sub>, ppm): δ 7.36 – 7.30 (m, 2H, ArH), 7.20 – 7.03 (m, 20H, ArH), 7.01 – 6.97 (m, 3H, ArH), 6.95 – 6.91 (m, 2H, ArH), 5.93 (s, 1H, -C=CH-), 3.95 (s, 2H, -OCH<sub>2</sub>-), 3.88 (m, 2H, -OCH<sub>2</sub>-), 1.82 – 1.71 (m, 9H, -CH, -CH<sub>2</sub>-, and -C(CH<sub>3</sub>)<sub>2</sub>), 1.57 – 1.31 (m, 10H, -CH<sub>2</sub>-), 1.04 – 0.90 (m, 9H, -CH<sub>3</sub>). <sup>13</sup>C NMR (100 MHz, CDCl<sub>3</sub>, ppm): δ 183.5, 174.9, 170.5, 158.8, 143.5, 143.1, 142.4, 142.2, 141.6, 140.1, 139.2, 133.2, 131.4, 131.3, 127.7, 127.6, 126.9, 126.6, 126.5, 123.9, 123.6, 122.2, 114.5, 109.3, 86.1, 70.5, 49.4, 43.4, 39.4, 30.5, 29.1,

29.0, 27.2, 23.9, 23.1, 20.3, 14.1, 13.8, 11.2. HR-ESI-MS:  $m/z$  calcd. for  $C_{59}H_{60}N_2O_3$ : 845.46767  $[M+H]^+$ , found 845.46736  $[M+H]^+$ . Element analysis calcd. for  $C_{59}H_{60}N_2O_3$ : C (83.85%), H (7.16%), N (3.31%); found: C (83.79%), H (7.10%), N (3.41%).

### **Preparation of Solutions of Anions**

0.5 mmol of inorganic salt (NaF, NaCl, NaBr,  $NaClO_4 \cdot H_2O$ ,  $Na_2CO_3$ ,  $NaClO \cdot 5H_2O$ ,  $NaNO_2$ ,  $NaOAc \cdot 3H_2O$ , KSCN) and  $H_2O_2$  were dissolved in distilled water (10 mL) to afford  $5 \times 10^{-2}$  mol/L aqueous solution. The stock solutions were diluted to desired concentrations with distilled water when needed.

### **Fluorescence Titration of TPE-SQ3 with $ClO^-$**

A solution of **TPE-SQ3** ( $5 \times 10^{-6}$  mol/L) was prepared in THF/ $H_2O$  solution (5/95, V/V). Then 4.0 mL of the solution of **TPE-SQ3** was placed in a quartz cell (10.0 mm width) and the fluorescence spectrum was recorded. The  $NaClO$  solution was introduced in portions and fluorescent intensity changes were recorded at room temperature each time (Excitation wavelength: 529 nm).

### **Fluorescence Intensity Changes of TPE-SQ3 with Other Anions:**

A solution of **TPE-SQ3** ( $5 \times 10^{-6}$  mol/L) was prepared in THF/ $H_2O$  solution (5/95, V/V). Then 4.0 mL of the solution of **TPE-SQ3** was placed in a quartz cell (10.0 mm width) and the fluorescence spectrum was recorded. Different anion solutions were introduced and the changes of the fluorescence intensity were recorded at room temperature each time (Excitation wavelength: 529 nm).

### **Fabrication of TPE-SQ3 NPs:**

The **TPE-SQ3**-loaded PEG-*b*-PCL NPs were prepared through a modified nano-precipitation method. Briefly, PEG-*b*-PCL (3 mg) and **TPE-SQ3** (5 mg) were dispersed and stirred in THF (10 mL) in a vial at room temperature for 30 min. Then, neat water (30 mL) was added dropwise into the solution under vigorous stirring via a syringe pump at a flow rate of 0.05 mL/min, and the dispersion was left stirring for another 12 h. THF was then removed by

dialysis (MWCO = 6000 Da) against neat water for 24 h to obtain NPs. We made NPs to facilitate phagocytosis into the 4T1 cells for imaging.

#### Cell culture:

4T1 (mouse breast cancer cells) cells were obtained from the American Type Culture Collection (Manassas, VA, USA). All cells were dispersed in FBS containing 10% DMSO and stored in -80 °C refrigerator.

#### Cell fluorescence imaging:

4T1 cells were cultured in complete Dulbecco's modified Eagle's medium (DMEM) containing 10% (V/V) FBS at 37 °C in CO<sub>2</sub>–air (5%/95%). Afterward, Cells were seeded on sterilized coverslips in 6-well plates at a density of  $2.0 \times 10^6$  cells per well in 2.0 mL of complete DMEM for 24 h, and then incubated with the **TPE-SQ3**-loaded PEG-*b*-PCL NPs at a final Dox concentration of 10.0 mg/L for another 4 h. Subsequently, CLSM (Olympus FV1000, Tokyo, Japan) images were taken. Excitation wavelength: 397 nm, emission collected: 630–660 nm.

**Table S1.** Crystal data of **TPE-SQ1**.

|                                 |                                                               |                 |
|---------------------------------|---------------------------------------------------------------|-----------------|
| Identification code             | mo_191011c_0m                                                 |                 |
| Empirical formula               | C <sub>68</sub> H <sub>48</sub> N <sub>2</sub> O <sub>2</sub> |                 |
| Formula weight                  | 925.08                                                        |                 |
| Temperature                     | 220(1) K                                                      |                 |
| Wavelength                      | 0.71073 Å                                                     |                 |
| Crystal system                  | Triclinic                                                     |                 |
| Space group                     | P-1                                                           |                 |
| Unit cell dimensions            | a = 9.2148(13) Å                                              | a = 78.093(2)°. |
|                                 | b = 9.4425(13) Å                                              | b = 87.741(2)°. |
|                                 | c = 14.798(2) Å                                               | g = 86.000(2)°. |
| Volume                          | 1256.4(3) Å <sup>3</sup>                                      |                 |
| Z                               | 1                                                             |                 |
| Density (calculated)            | 1.223 Mg/m <sup>3</sup>                                       |                 |
| Absorption coefficient          | 0.073 mm <sup>-1</sup>                                        |                 |
| F(000)                          | 486                                                           |                 |
| Crystal size                    | 0.12 x 0.1 x 0.1 mm <sup>3</sup>                              |                 |
| Theta range for data collection | 1.407 to 25.494°.                                             |                 |

|                                   |                                             |
|-----------------------------------|---------------------------------------------|
| Index ranges                      | -11<=h<=11, -11<=k<=10, -                   |
| 17<=l<=17                         |                                             |
| Reflections collected             | 9170                                        |
| Independent reflections           | 4628 [R(int) = 0.0225]                      |
| Completeness to theta = 25.242°   | 98.9 %                                      |
| Absorption correction             | Semi-empirical from equivalents             |
| Max. and min. transmission        | 0.7463 and 0.6383                           |
| Refinement method                 | Full-matrix least-squares on F <sup>2</sup> |
| Data / restraints / parameters    | 4628 / 0 / 325                              |
| Goodness-of-fit on F <sup>2</sup> | 1.053                                       |
| Final R indices [I>2sigma(I)]     | R1 = 0.0571, wR2 = 0.1804                   |
| R indices (all data)              | R1 = 0.0692, wR2 = 0.2027                   |
| Extinction coefficient            | n/a                                         |
| Largest diff. peak and hole       | 0.811 and -0.228 e.Å <sup>-3</sup>          |

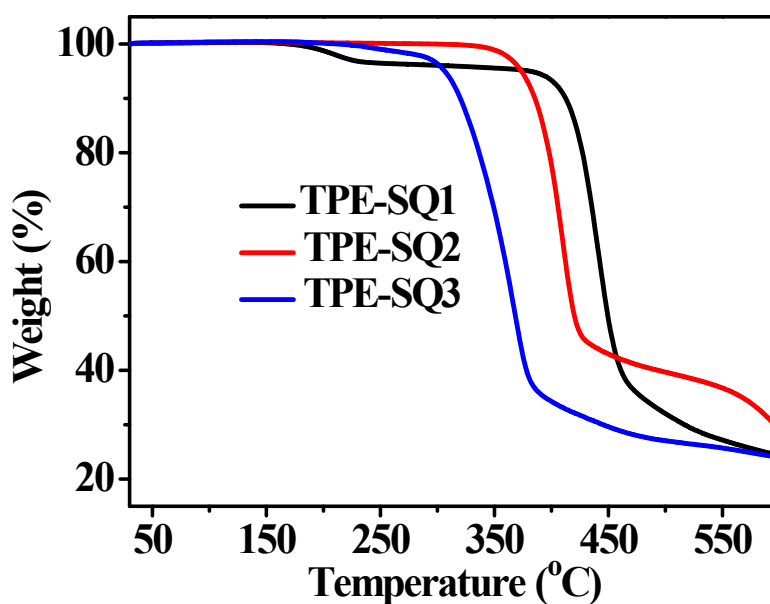

**Fig. S1** Thermogravimetric analysis (TGA) of TPE-SQ1-3 with a heating rate of 10 °C min<sup>-1</sup> under N<sub>2</sub> atmosphere.

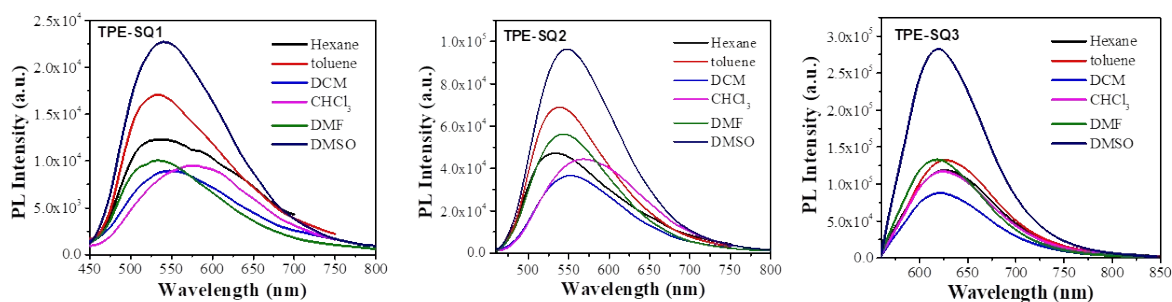

**Fig. S2** Fluorescent spectra of TPE-SQ1-3 in different solvents.

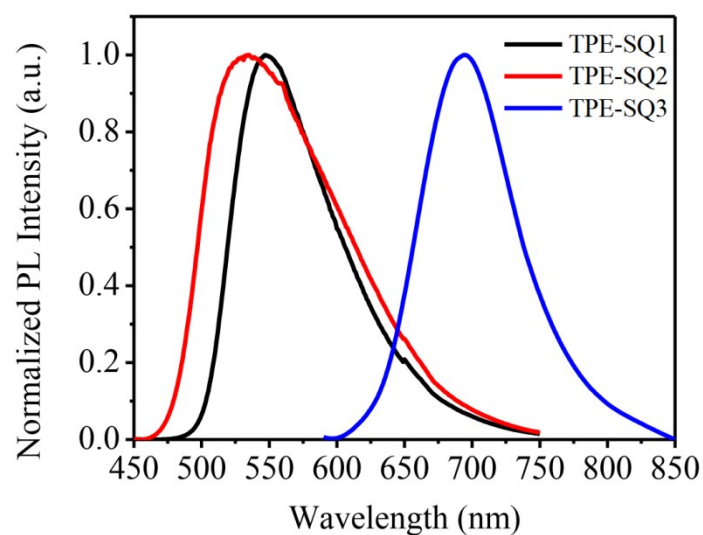

**Fig. S3** Solid state emission spectra of as-prepared powders of **TPE-SQ1-3**.

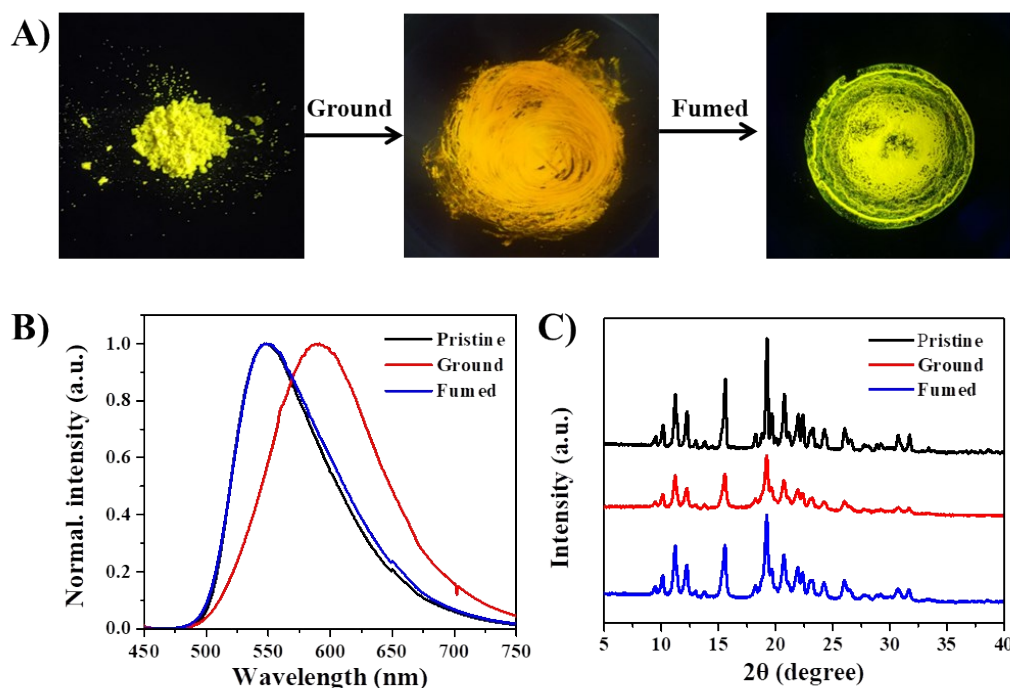

**Fig. S4** (A) Mechanochromism photographs of pristine, ground and fumed **TPE-SQ1** powders under 365 nm UV lamp; Emission spectra (B) XRD patterns (C) of pristine, ground and fumed **TP1-SQ1** powders.

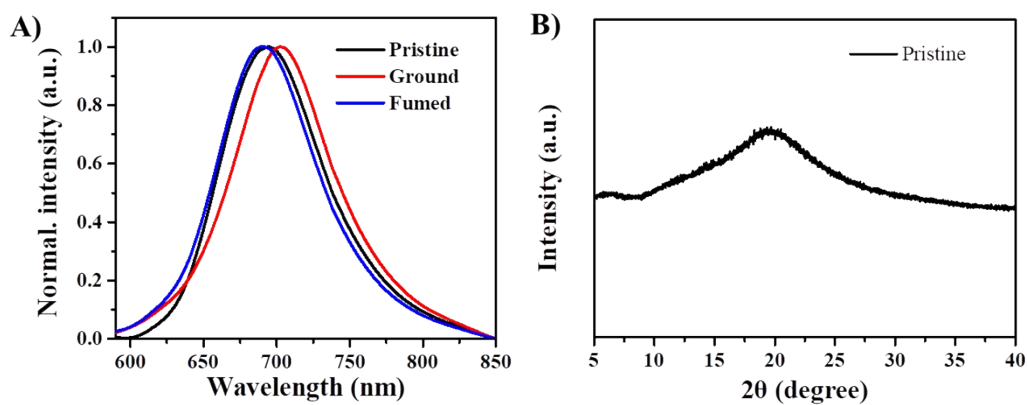

**Fig. S5** Emission spectra (A) XRD patterns (B) of pristine, ground and fumed **TPE-SQ3** powders.

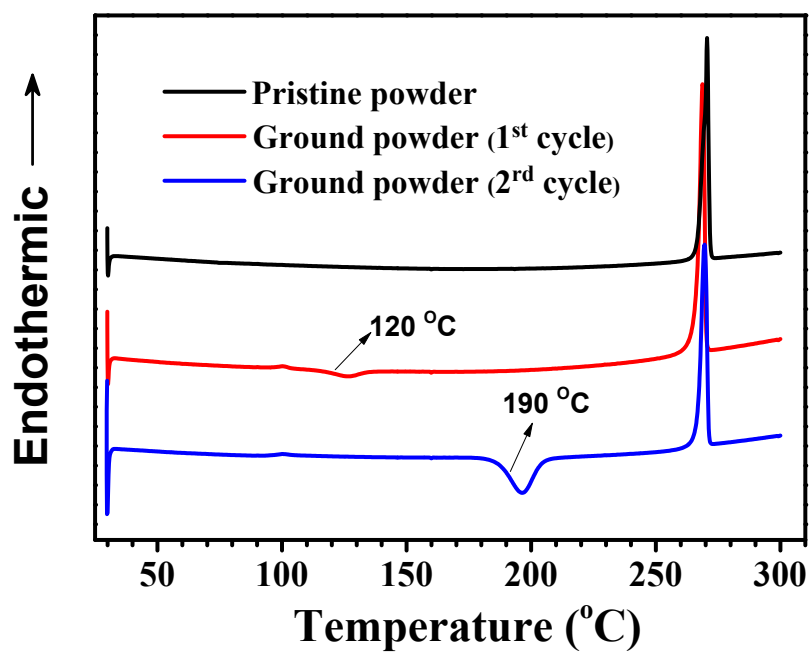

**Fig. S6** DSC thermograms of pristine, ground powders **TPE-SQ2** recorded under a  $N_2$  atmosphere at a heating rate of  $10\text{ }^{\circ}\text{C min}^{-1}$ .

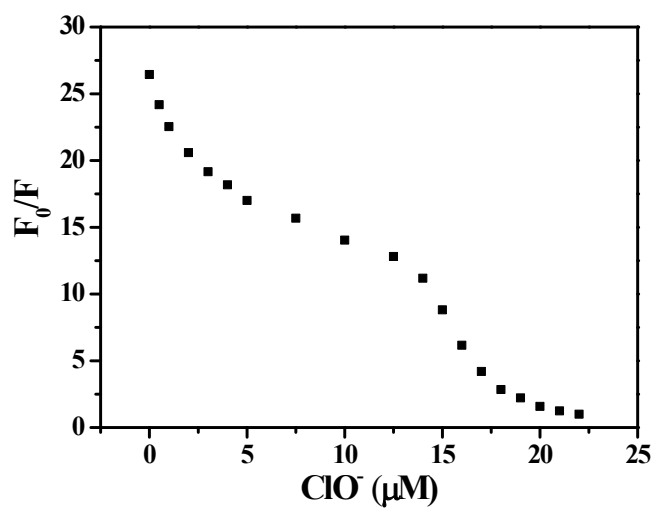

**Fig. S7** Plot of fluorescent intensity change of **TPE-SQ3** at 650 nm versus different concentrations of  $\text{ClO}^-$ .

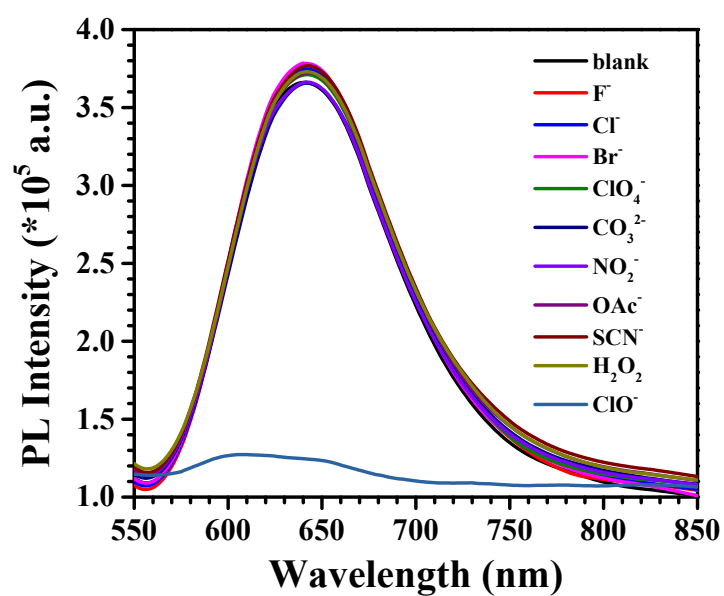

**Fig. S8** Fluorescent spectra of **TPE-SQ3** (5  $\mu\text{M}$ ) in a 95%  $\text{H}_2\text{O}/\text{THF}$  solution with  $\text{ClO}^-$  and various competitive analytes (4 equiv.).

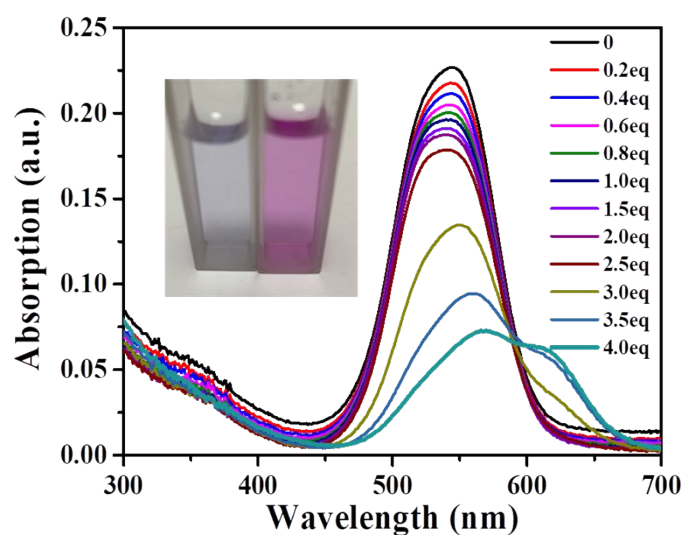

**Fig. S9** Absorption titration spectra of **TPE-SQ3** (5  $\mu$ M) in a 95%  $\text{H}_2\text{O}/\text{THF}$  solution with different concentrations of  $\text{ClO}^-$ . Inset: Photographs before (right) and after (left) adding  $\text{ClO}^-$ .

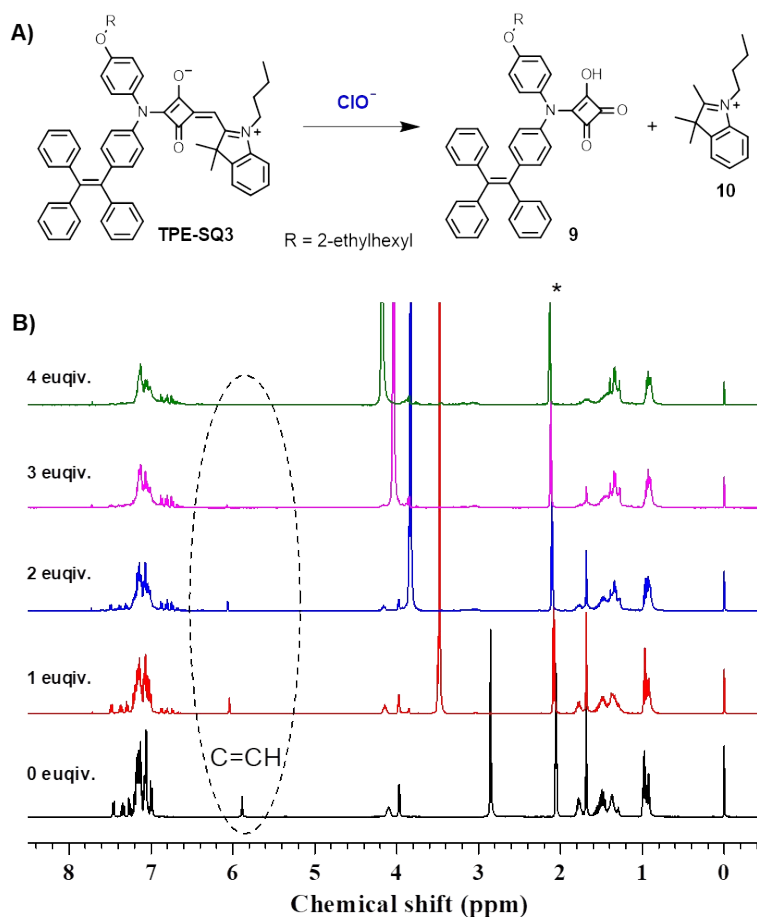

**Fig. S10** The packing  $^1\text{H}$  NMR titration spectra of **TPE-SQ3** (0.01 mM) before and after different concentrations of  $\text{ClO}^-$  conducted in acetone- $d_6$  (\*).

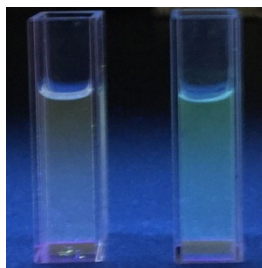

**Fig. S11** Photographs of compound **9** in THF solution (left) and in THF/water mixture with a water volume fraction of 90% (right).

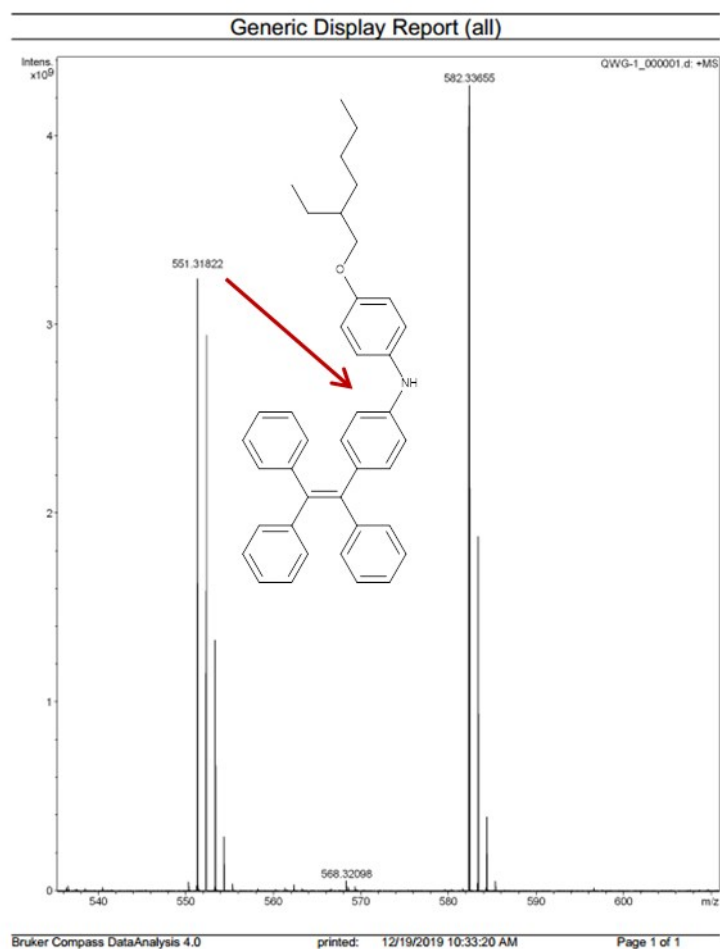

**Fig. S12** ESI-MS spectrum of reaction solution of **TPE-SQ3** with  $\text{ClO}^-$ .

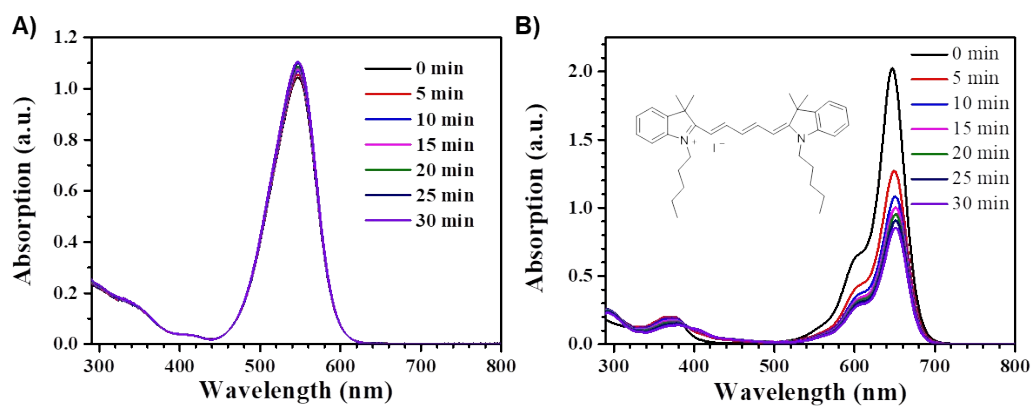

**Fig. S13** The absorption spectra of **TPE-SQ3** (A) and **DPPI** (B) under light irradiation (120 mW/cm<sup>2</sup>, 400-1000 nm) for different time in THF. Insert in **Fig. S13B** is the structure of DPPI.

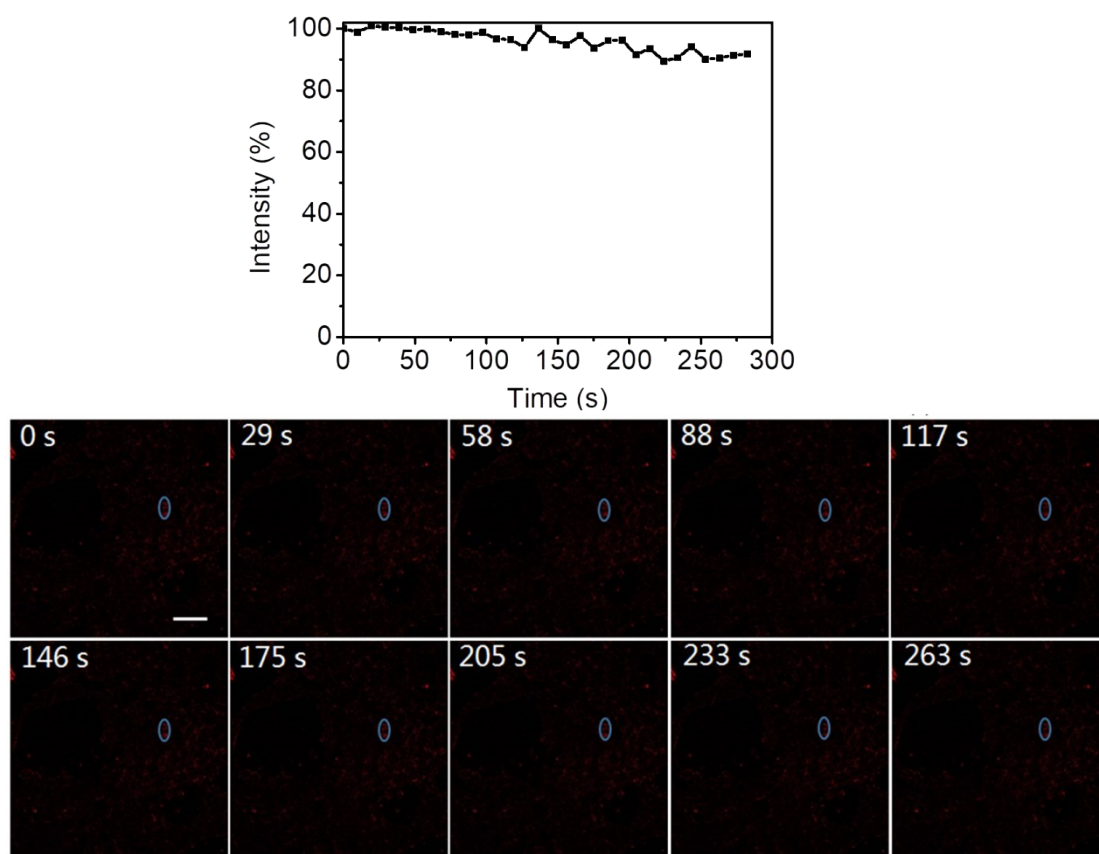

**Fig. S14** (A) Dynamic fluorescent intensity changes of 4T1 cancer cells stained with **TPE-SQ3** with increasing time upon continuous laser excitation at 397 nm of CLSM scans at 10% laser power; (B) CLSM images of 4T1 cancels cells stained with **TPE-SQ3** taken at various scanning times.

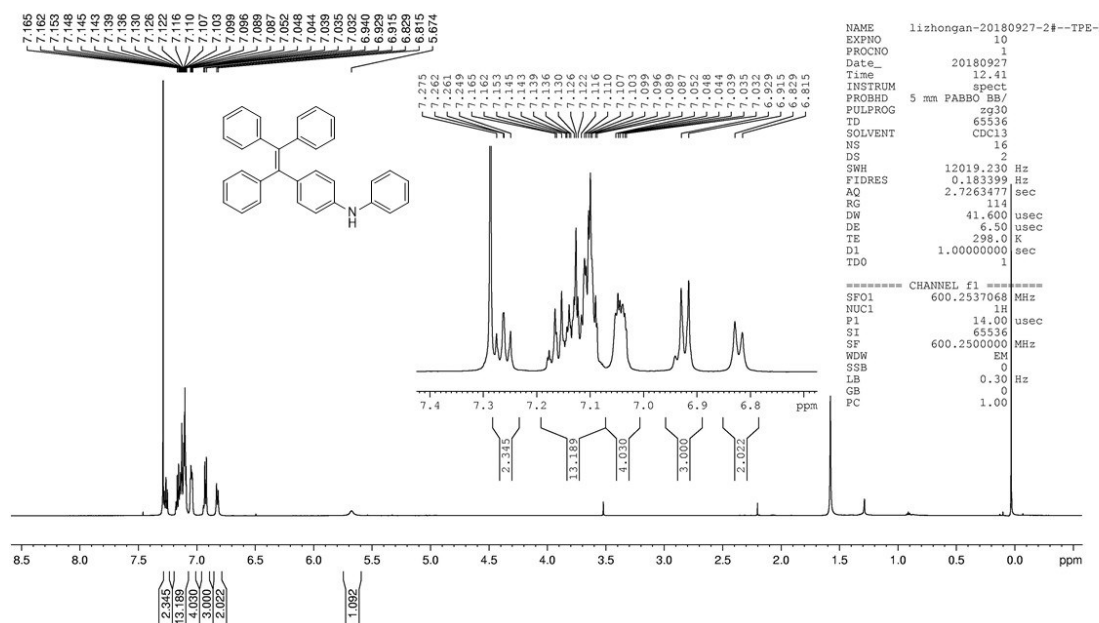

**Fig. S15** <sup>1</sup>H NMR spectrum of compound **4** in CDCl<sub>3</sub>.

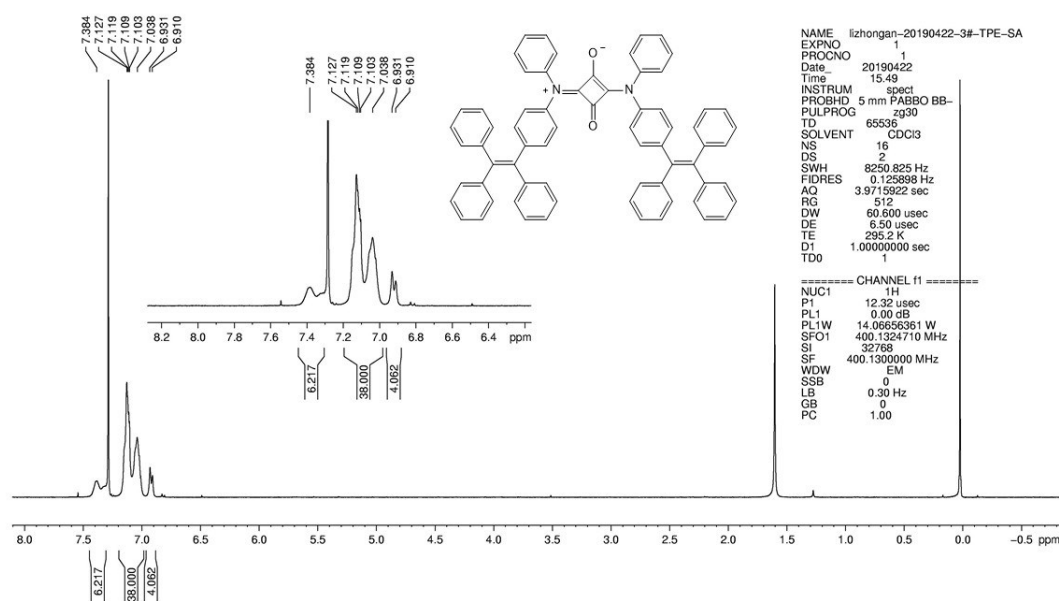

**Fig. S16** <sup>1</sup>H NMR spectrum of compound **TPE-SQ1** in CDCl<sub>3</sub>.

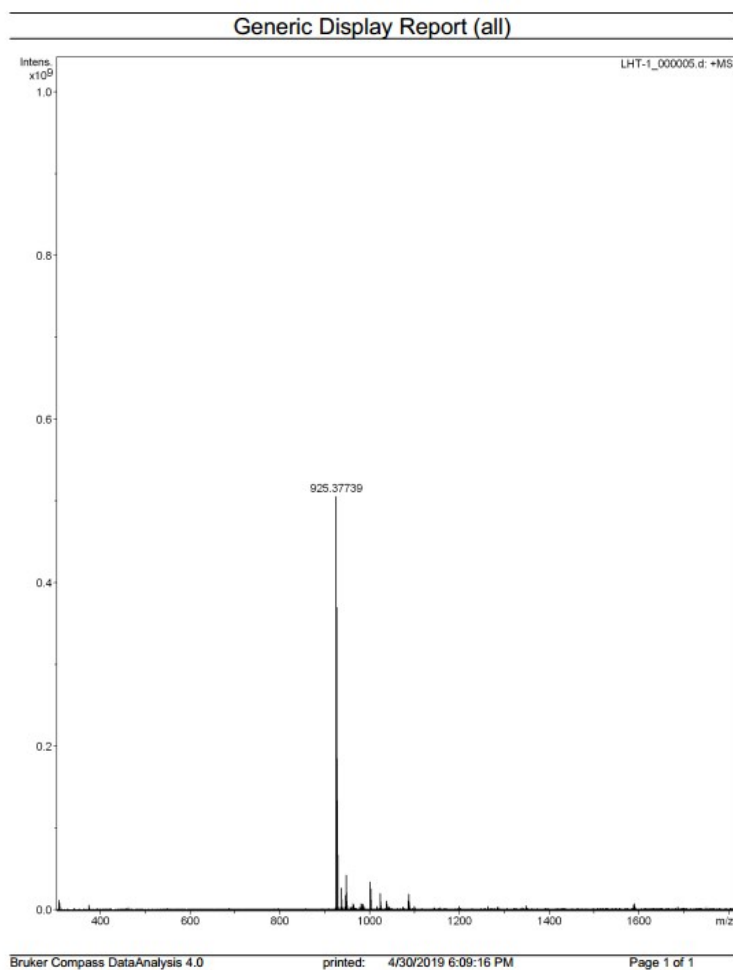

**Fig. S17** HR-ESI-MS spectrum for TPE-SQ1.

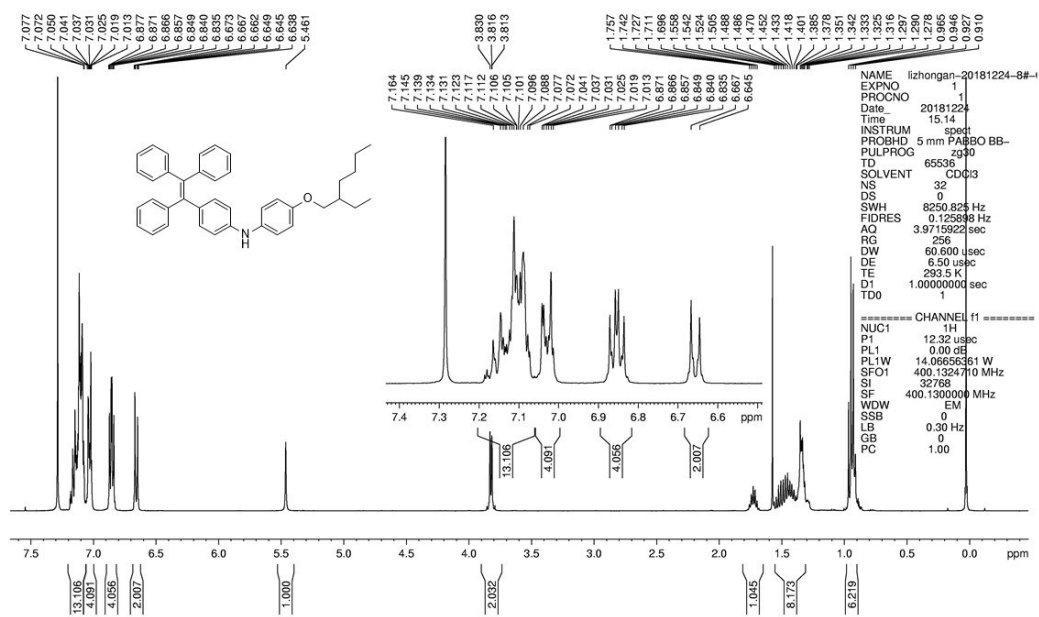

**Fig. S18**  $^1\text{H}$  NMR spectrum of compound **5** in  $\text{CDCl}_3$ .

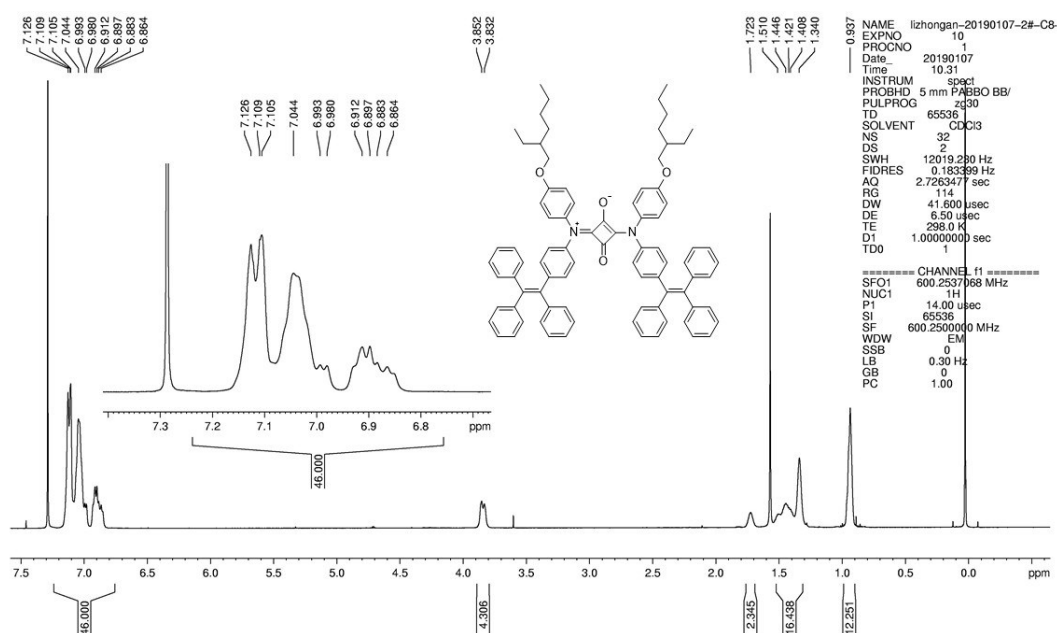

**Fig. S19**  $^1\text{H}$  NMR spectrum of compound **TPE-SQ2** in  $\text{CDCl}_3$ .

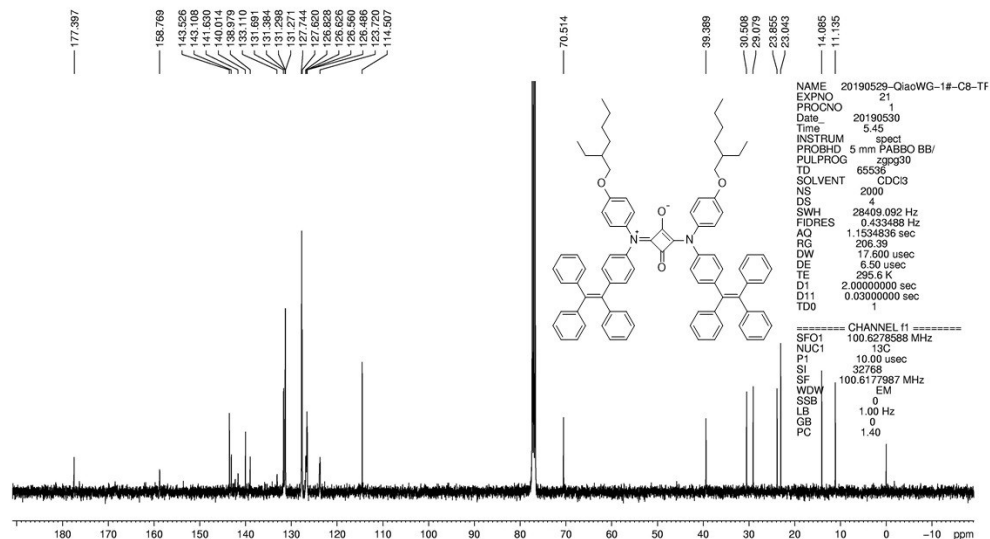

**Fig. S20**  $^{13}\text{C}$  NMR spectrum of compound **TPE-SQ2** in  $\text{CDCl}_3$ .

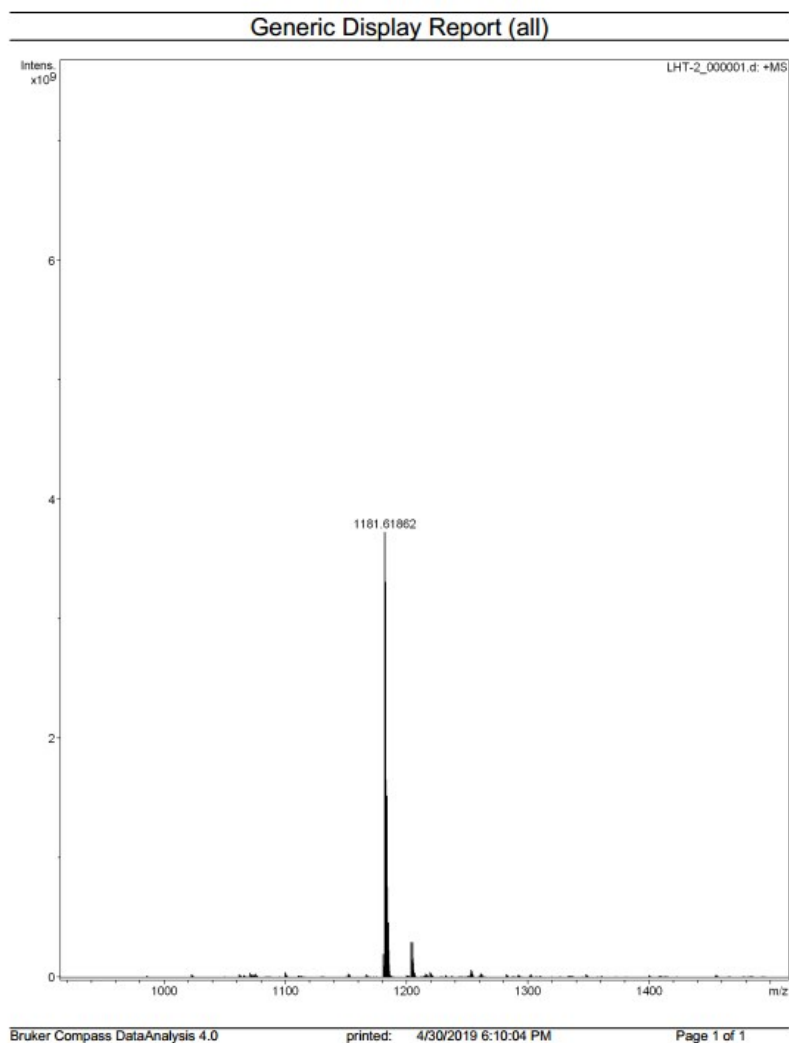

**Fig. S21** HR-ESI-MS spectrum for **TPE-SQ2**.

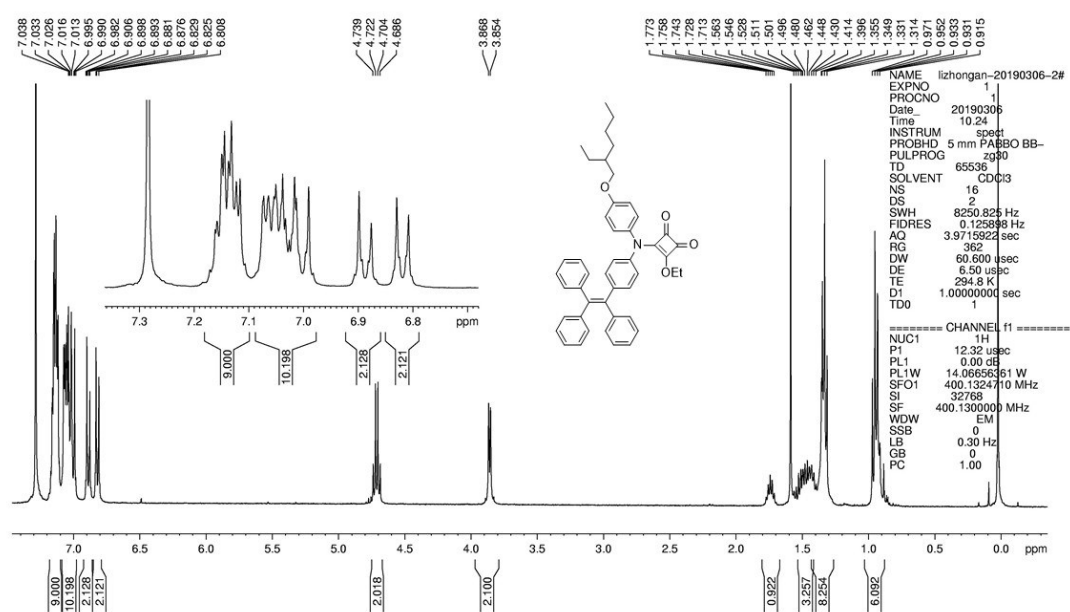

**Fig. S22** <sup>1</sup>H NMR spectrum of compound **8** in CDCl<sub>3</sub>.

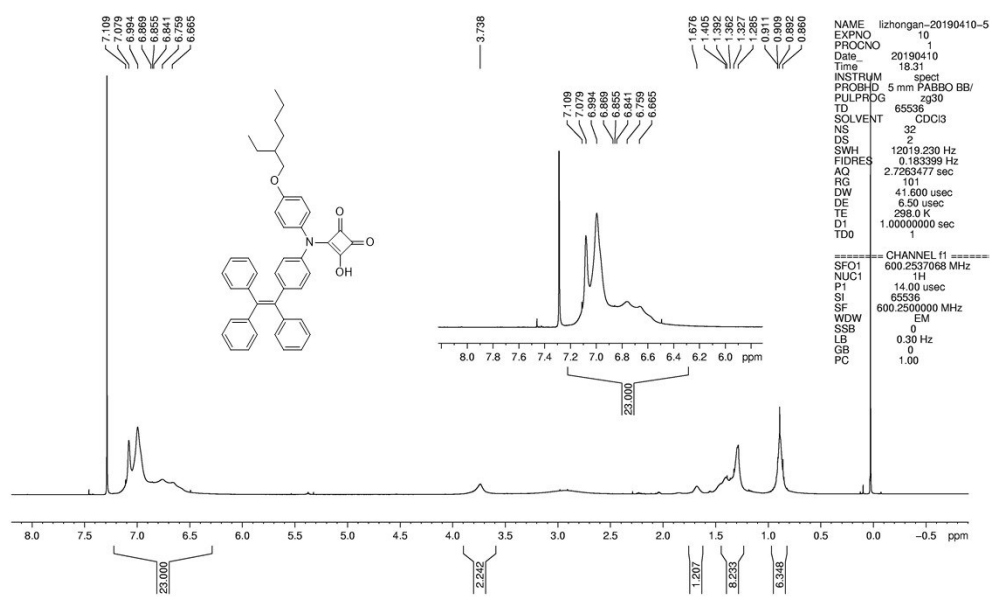

**Fig. S23**  $^1\text{H}$  NMR spectrum of compound **9** in  $\text{CDCl}_3$ .

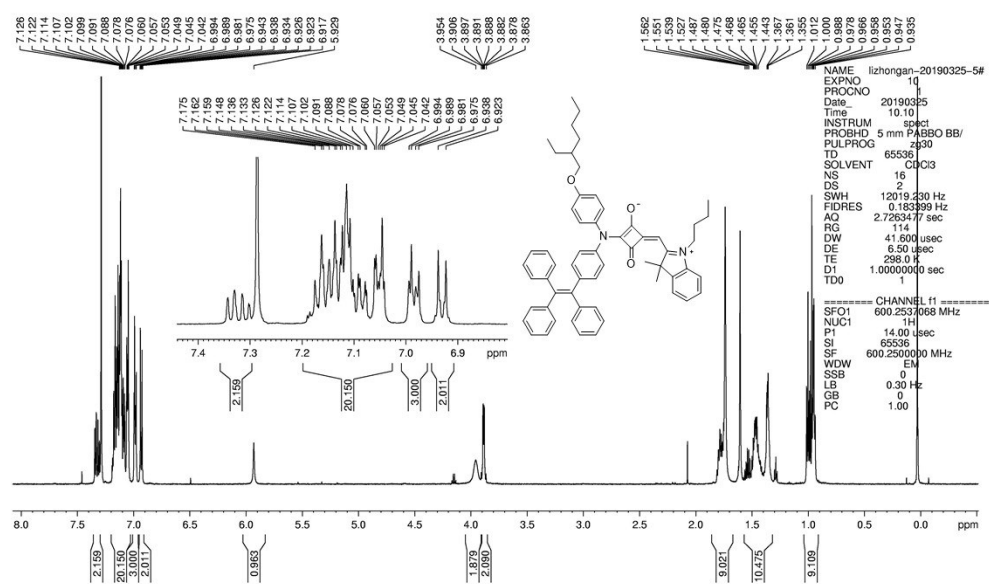

**Fig. S24**  $^1\text{H}$  NMR spectrum of compound **TPE-SQ3** in  $\text{CDCl}_3$ .

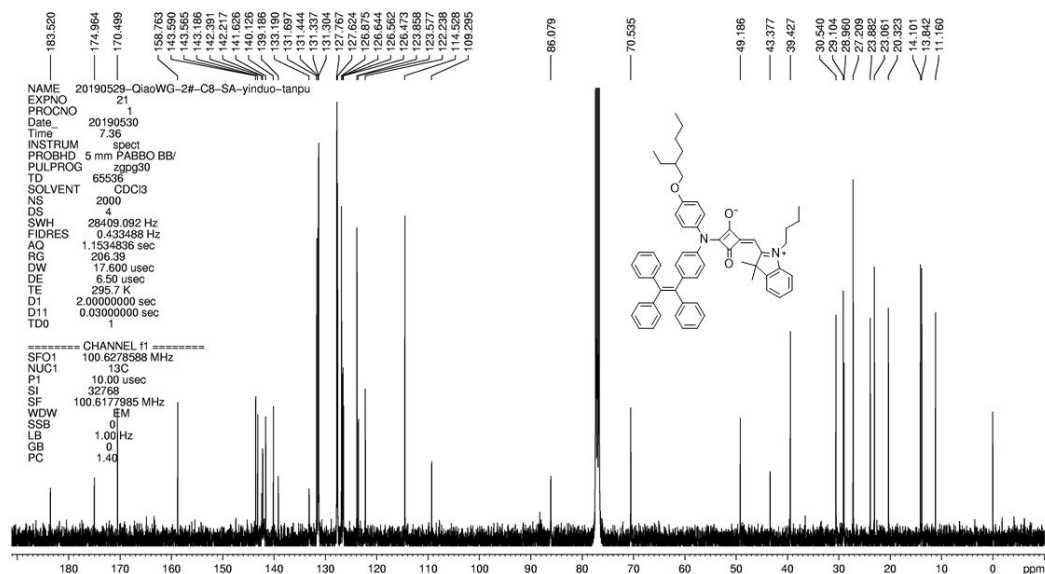

**Fig. S25**  $^{13}\text{C}$  NMR spectrum of compound **TPE-SQ3** in  $\text{CDCl}_3$ .

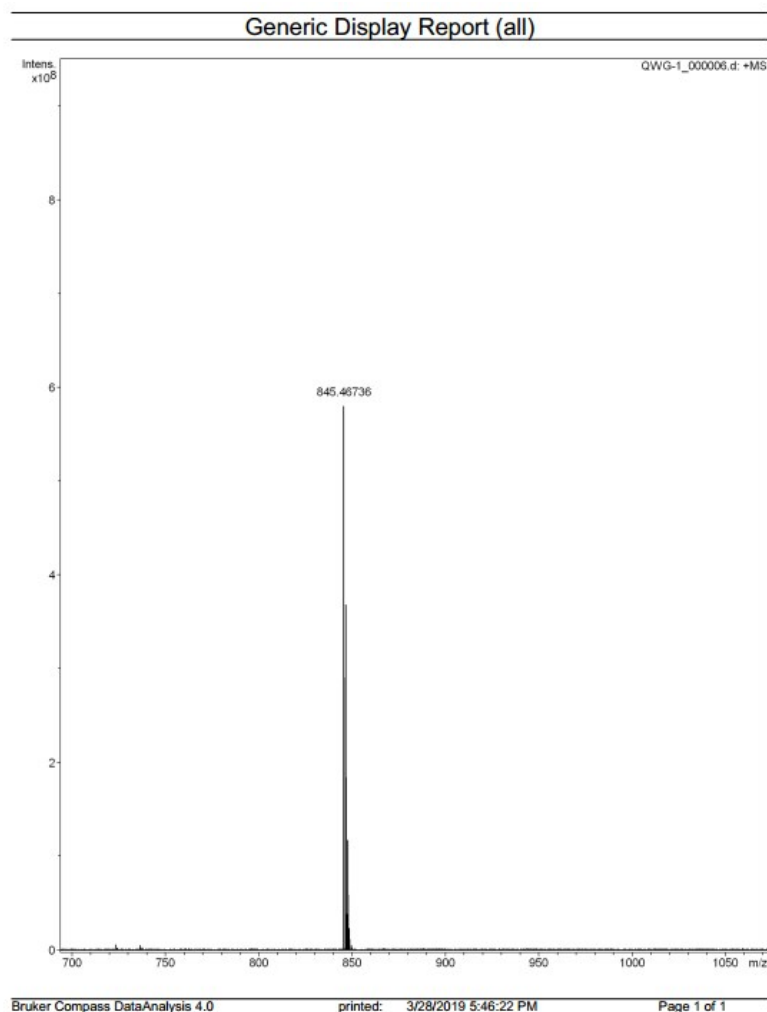

**Fig. S26** HR-ESI-MS spectrum for **TPE-SQ3**.

## References:

1. G. Liang, J. W. Y. Lam, W. Qin, J. Li, N. Xie and B. Z. Tang, Molecular luminogens based on restriction of intramolecular motions through host–guest inclusion for cell imaging, *Chem. Commun.*, 2014, **50**, 1725-1727.
2. M. Ito, T. X. Wei, P.-L. Chen, H. Akiyama, M. Matsumoto, K. Tamada and Y. Yamamoto, A novel method for creation of free volume in a one-component self-assembled monolayer. Dramatic size effect of para-carborane, *J. Mater. Chem.*, 2005, **15**, 478-483.
3. C. H. Lee, H. J. Yun, M. R. Jung, J. G. Lee, S. H. Kim and J. H. Kim, Preparation and Characterization of Squaraine Dyes containing Mono- and Bis-Anchoring Groups as the Light Absorber in Dye Sensitized Solar Cells, *Electrochim. Acta*, 2014, **138**, 148-154.
4. A. R. Tyler, A. O. Okoh, C. L. Lawrence, V. C. Jones, C. Moffatt and R. B. Smith, N-Alkylated 2,3,3-trimethylindolenines and 2-methylbenzothiazoles. Potential lead compounds in the fight against *Saccharomyces cerevisiae* infections, *Eur. J. Med. Chem.*, 2013, **64**, 222-227.
